# Supplementary material for: Experimentally evolvingDrosophila erectapopulations may fail to establish an effective piRNA-based host defense against invadingP-elements
Source: HighWire-hosted journal article supplement (doi:10.1101/gr.278706.123), 2024-03-15
Supplement: Supplemental_Fig_S3.pdf [file Supplemental_Fig_S3.pdf]

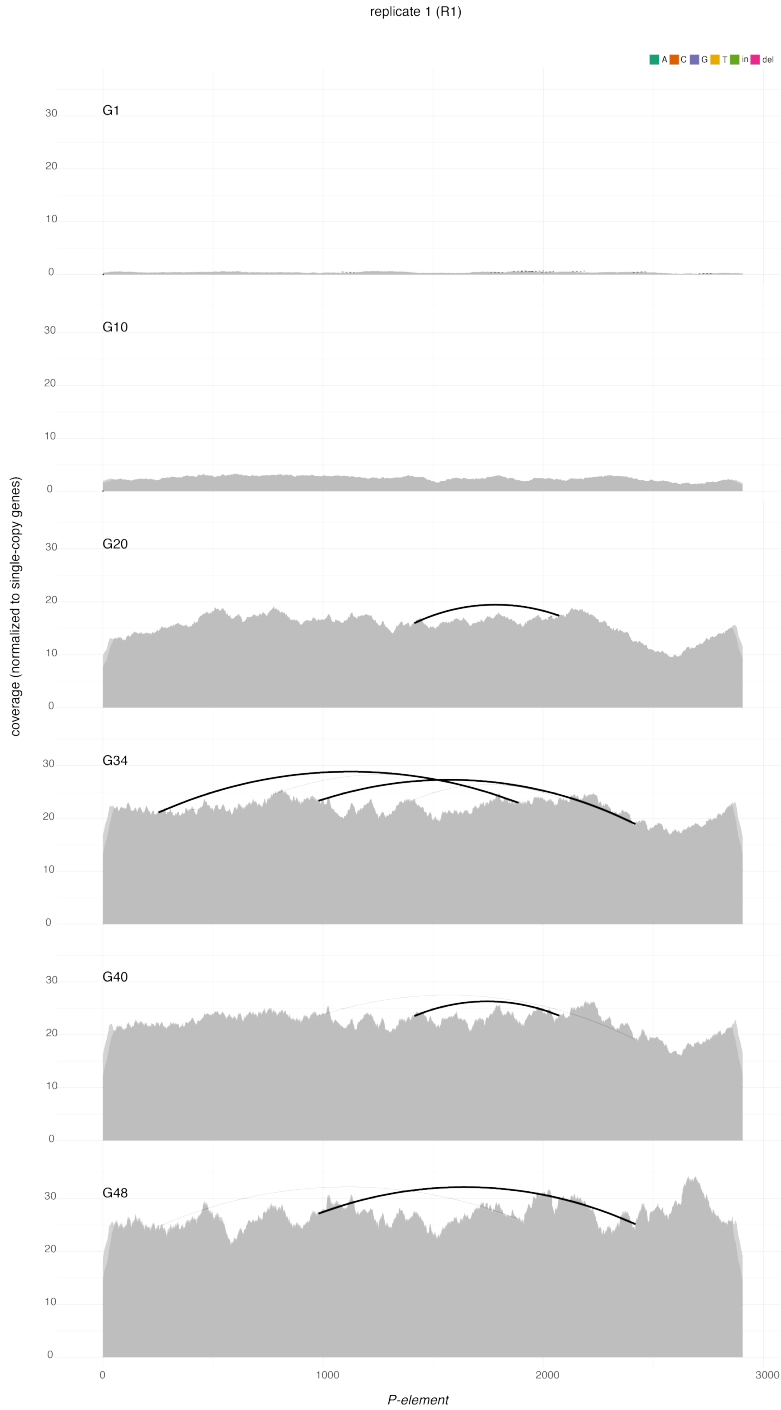

Figure 3: Abundance and diversity of the *P-element* during the invasion in replicate 1 visualized with DeviaTE [Weilguny and Kofler, 2019](#). Single-nucleotide polymorphisms (SNPs) and small internal deletions (indels) are shown as colored lines. The absence of colored lines highlights that the *P-element* has no SNPs or solely SNPs segregating at a very low frequency. Large internal deletions are shown as black arcs.
