# Supplementary material for: Experimentally evolvingDrosophila erectapopulations may fail to establish an effective piRNA-based host defense against invadingP-elements
Source: HighWire-hosted journal article supplement (doi:10.1101/gr.278706.123), 2024-03-15
Supplement: Supplemental_Fig_S5.pdf [file Supplemental_Fig_S5.pdf]

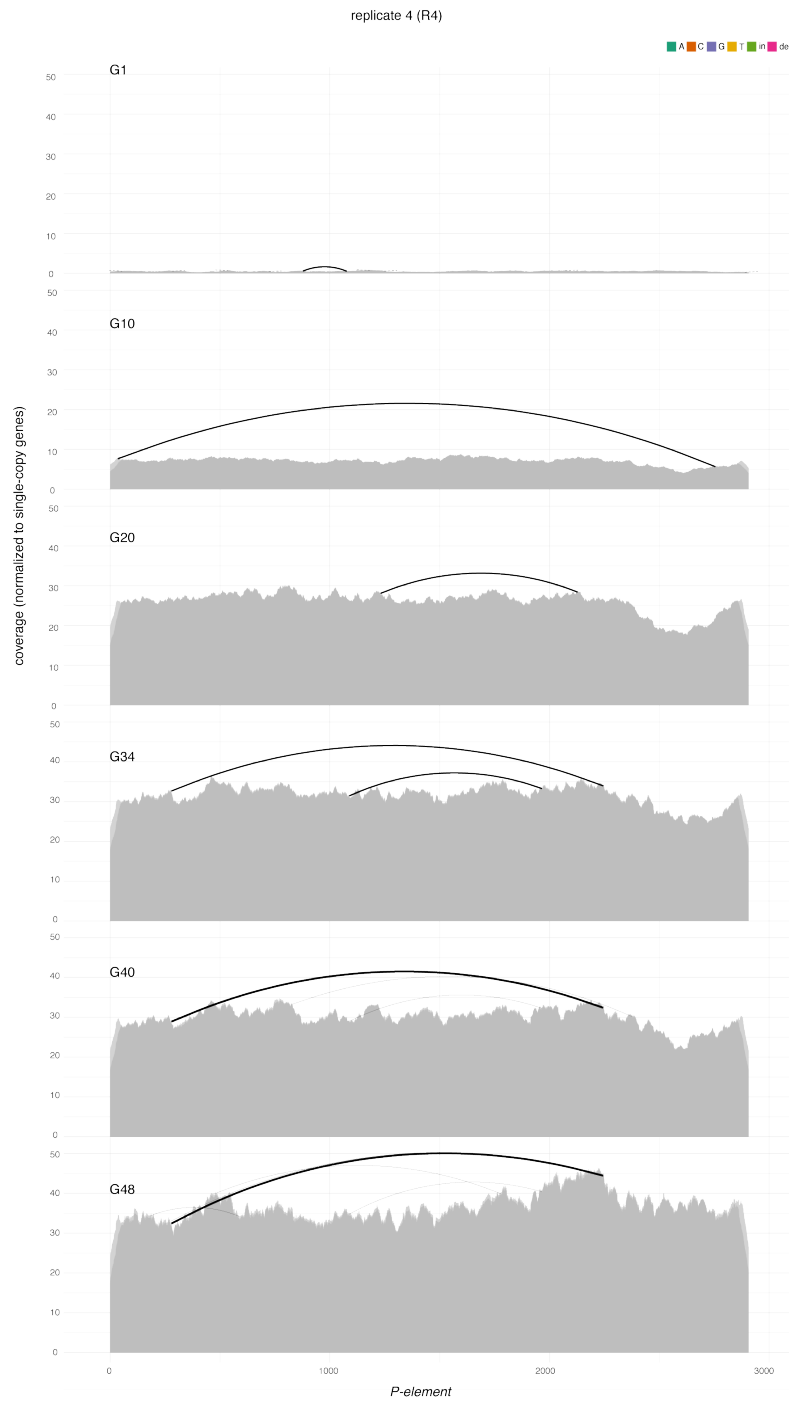

Figure 5: Abundance and diversity of the *P*-element during the invasion in replicate 4.
