# Supplementary material for: Experimentally evolvingDrosophila erectapopulations may fail to establish an effective piRNA-based host defense against invadingP-elements
Source: HighWire-hosted journal article supplement (doi:10.1101/gr.278706.123), 2024-03-15
Supplement: Supplemental_Fig_S6.pdf [file Supplemental_Fig_S6.pdf]

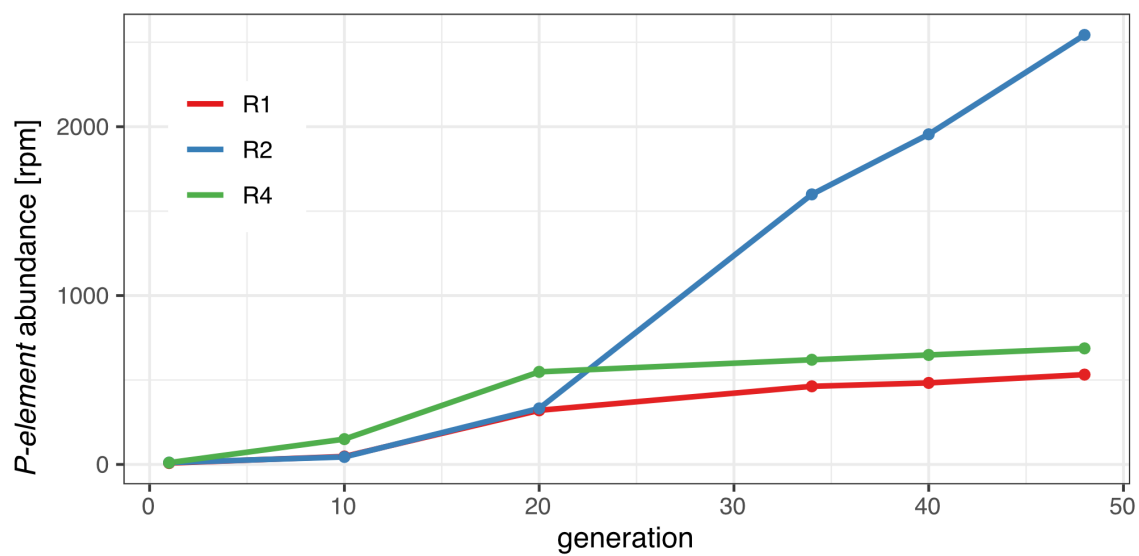

Figure 6: Abundance of *P-element* insertions during the invasion in reads mapping to the *P-element* out of a million reads (reader per million; rpm). Data are shown for three replicates (R1, R2, R4).
