# Supplementary material for: Experimentally evolvingDrosophila erectapopulations may fail to establish an effective piRNA-based host defense against invadingP-elements
Source: HighWire-hosted journal article supplement (doi:10.1101/gr.278706.123), 2024-03-15
Supplement: Supplemental_Fig_S8.pdf [file Supplemental_Fig_S8.pdf]

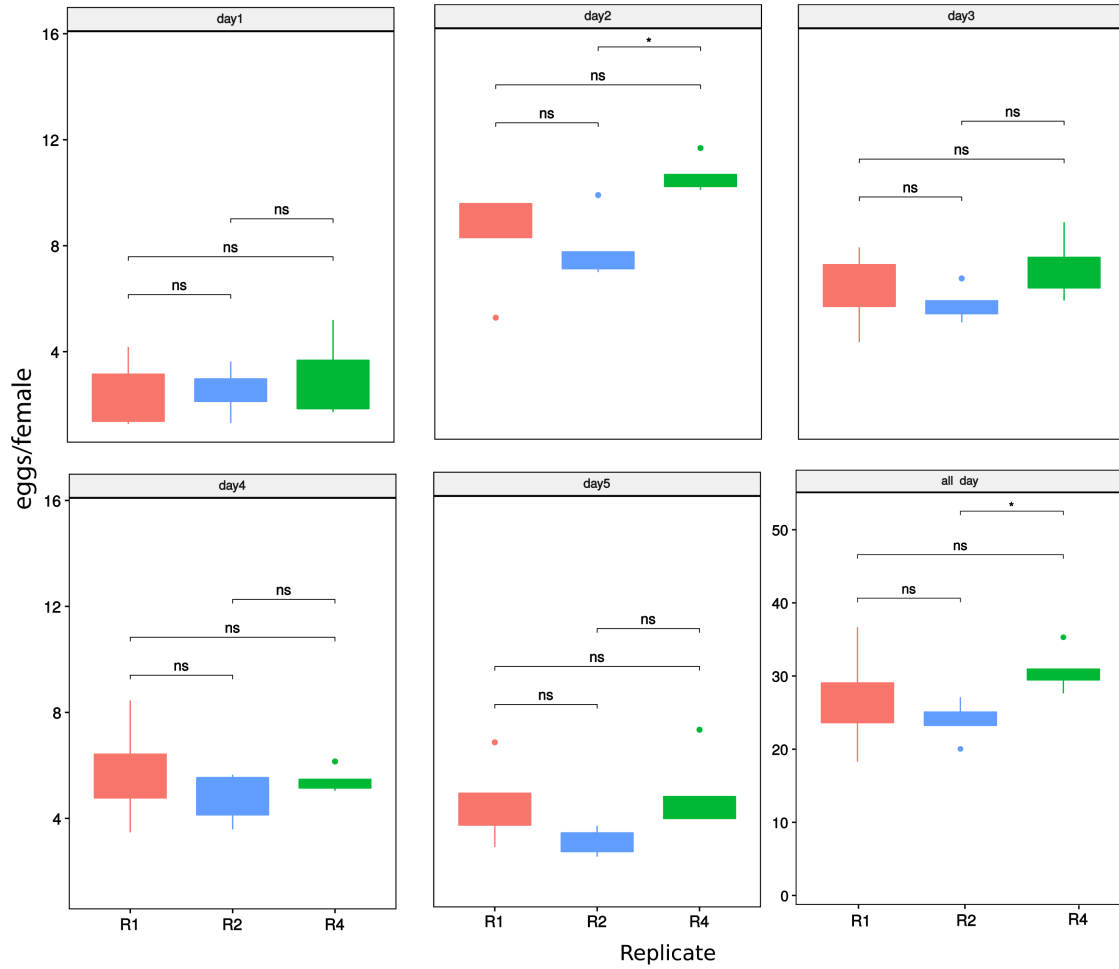

Figure 8: Fecundity in the different replicates at generation 88. We estimated the average fecundity per fly, by counting the number of eggs laid by 29-40 female at 5 successive days (starting with 5 day old flies). One generation of density control was performed at generation 88. Significance was computed with t-tests.
