# Supplementary material for: Experimentally evolvingDrosophila erectapopulations may fail to establish an effective piRNA-based host defense against invadingP-elements
Source: HighWire-hosted journal article supplement (doi:10.1101/gr.278706.123), 2024-03-15
Supplement: Supplemental_Fig_S10.pdf [file Supplemental_Fig_S10.pdf]

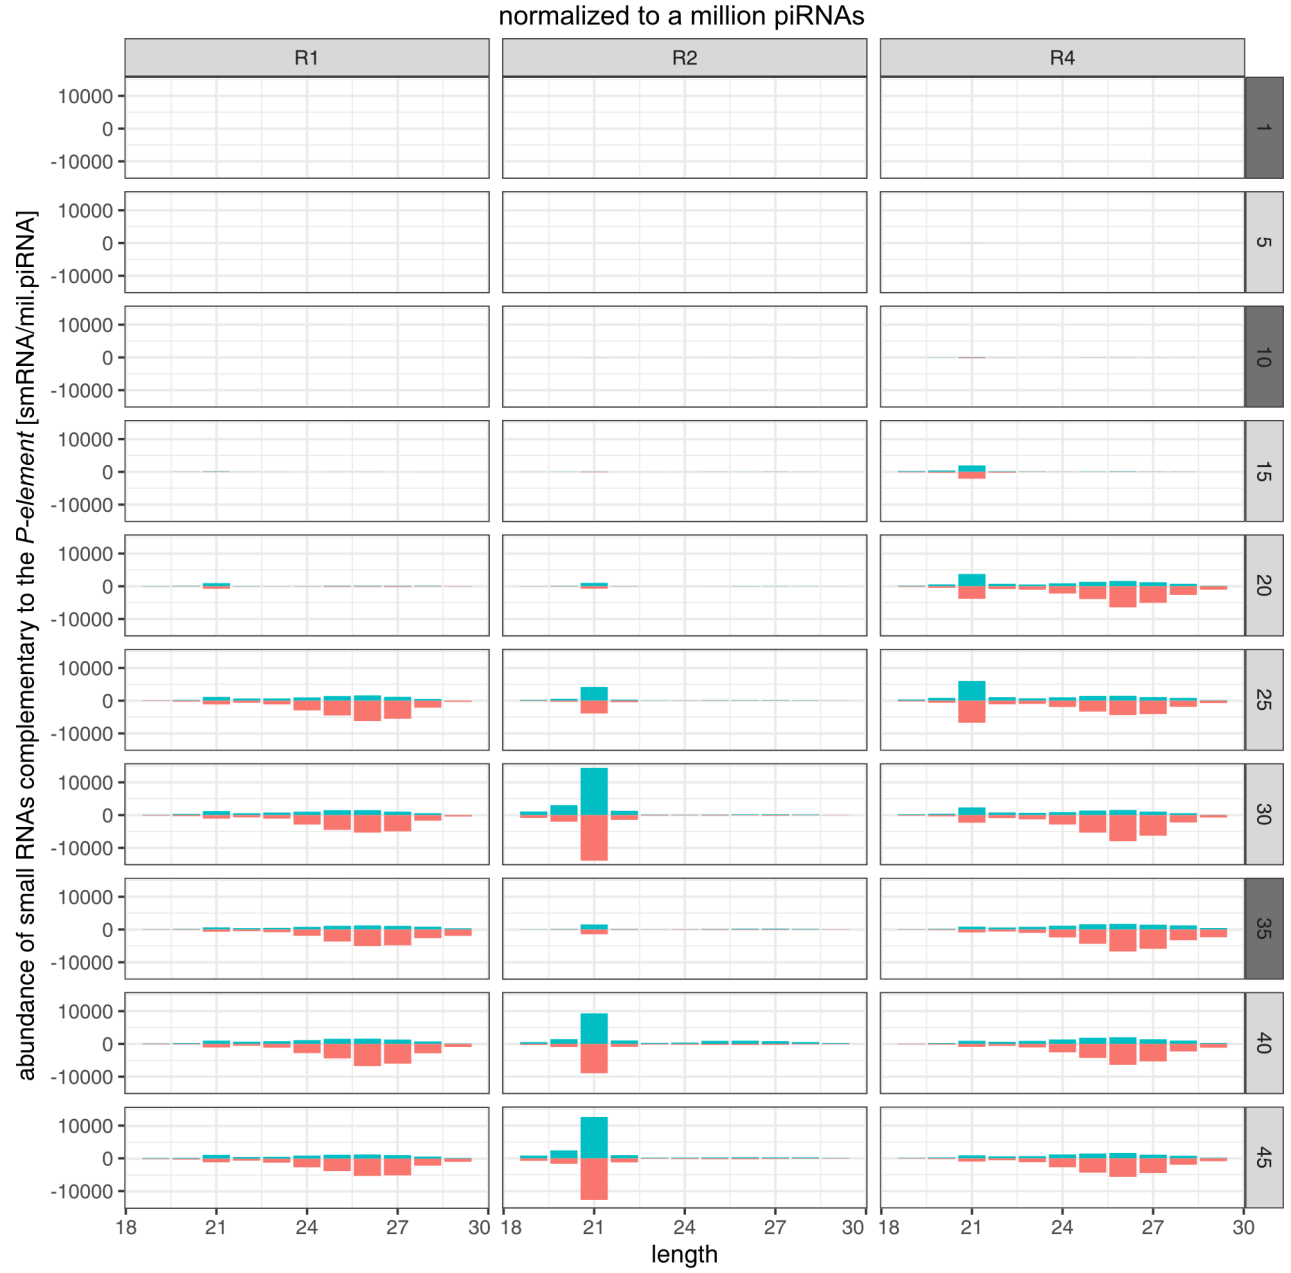

Figure 10: Length distribution of small RNAs mapping to the *P-element*. The abundance of small RNAs was normalized to 1 million piRNAs (smRNAs/mil.piRNA). Data are shown for three replicates (top panels) and several generations during the invasion (right panel). Sense RNAs are on the positive y-axis and antisense RNAs on the negative y-axis. small RNA data were either generated for whole bodies of female flies (light grey panels) or ovaries (dark grey panels).
