# Supplementary material for: Experimentally evolvingDrosophila erectapopulations may fail to establish an effective piRNA-based host defense against invadingP-elements
Source: HighWire-hosted journal article supplement (doi:10.1101/gr.278706.123), 2024-03-15
Supplement: Supplemental_Fig_S11.pdf [file Supplemental_Fig_S11.pdf]

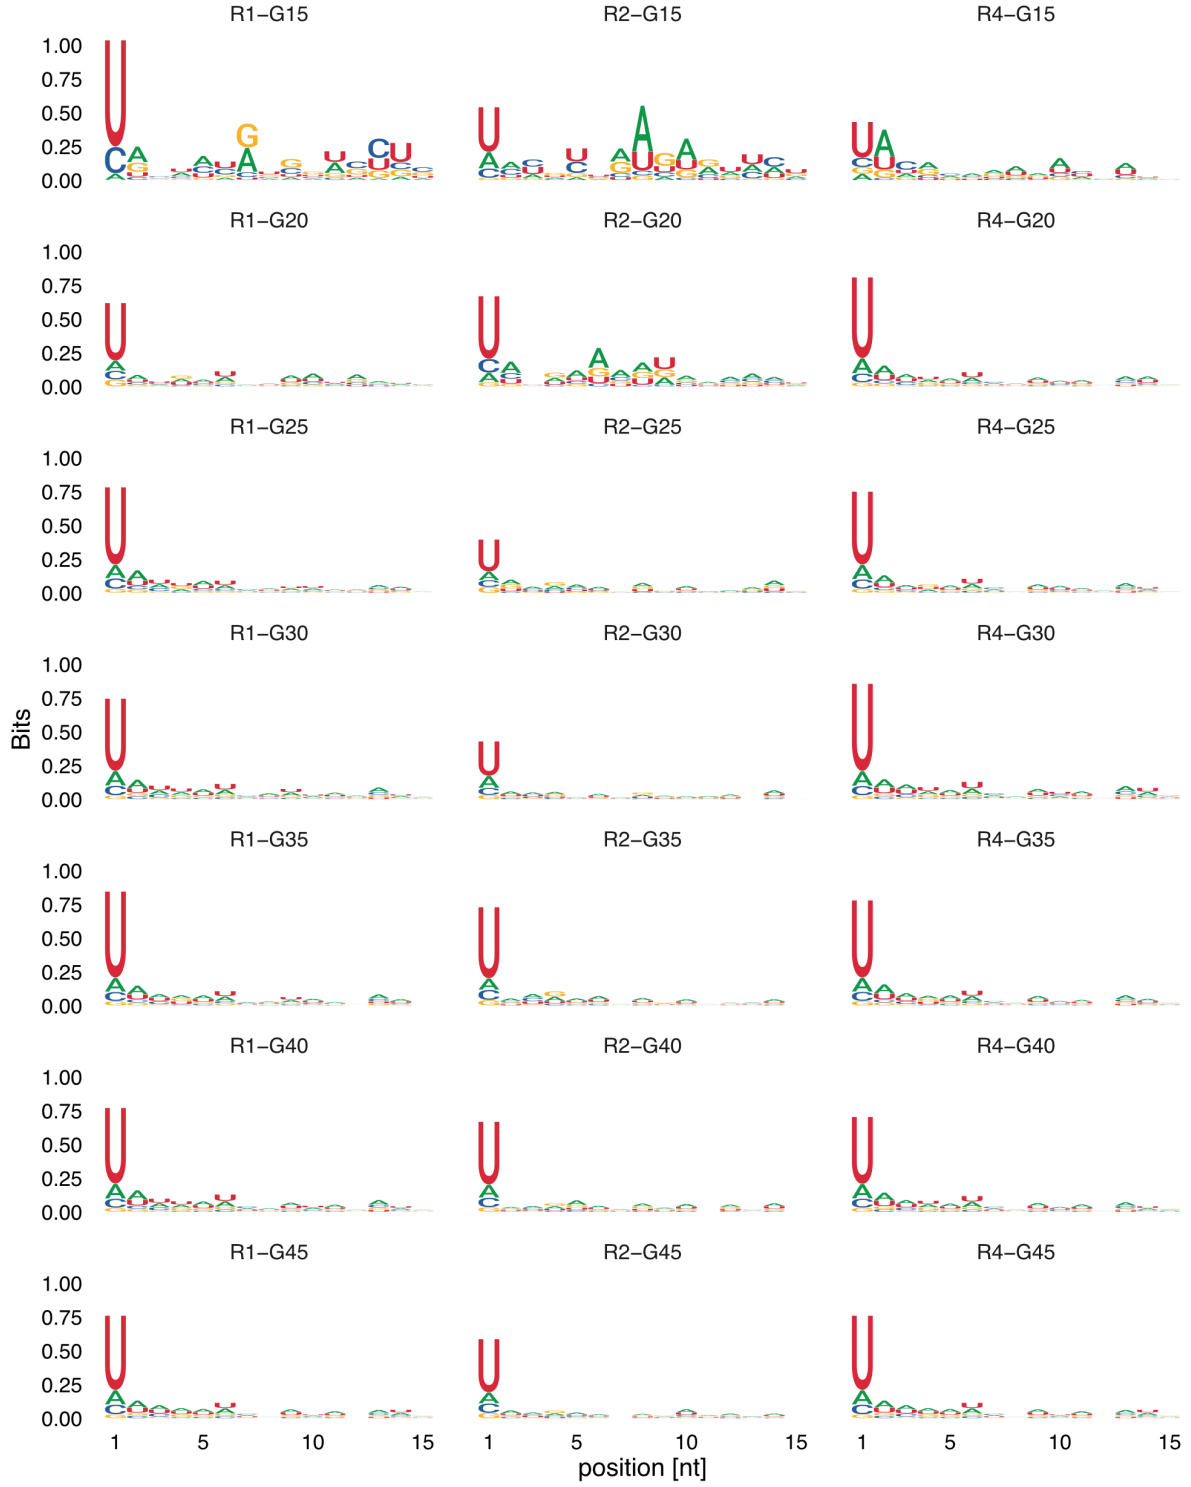

Figure 11: DNA motifs of *P-element* piRNAs (23-29nt). Data are shown for three replicates (R1, R2, R4) and multiple generations during the invasion (G15-G45). Prior to generation 15 the abundance of piRNAs was too small for computing motifs.
