# Supplementary material for: Experimentally evolvingDrosophila erectapopulations may fail to establish an effective piRNA-based host defense against invadingP-elements
Source: HighWire-hosted journal article supplement (doi:10.1101/gr.278706.123), 2024-03-15
Supplement: Supplemental_Fig_S12.pdf [file Supplemental_Fig_S12.pdf]

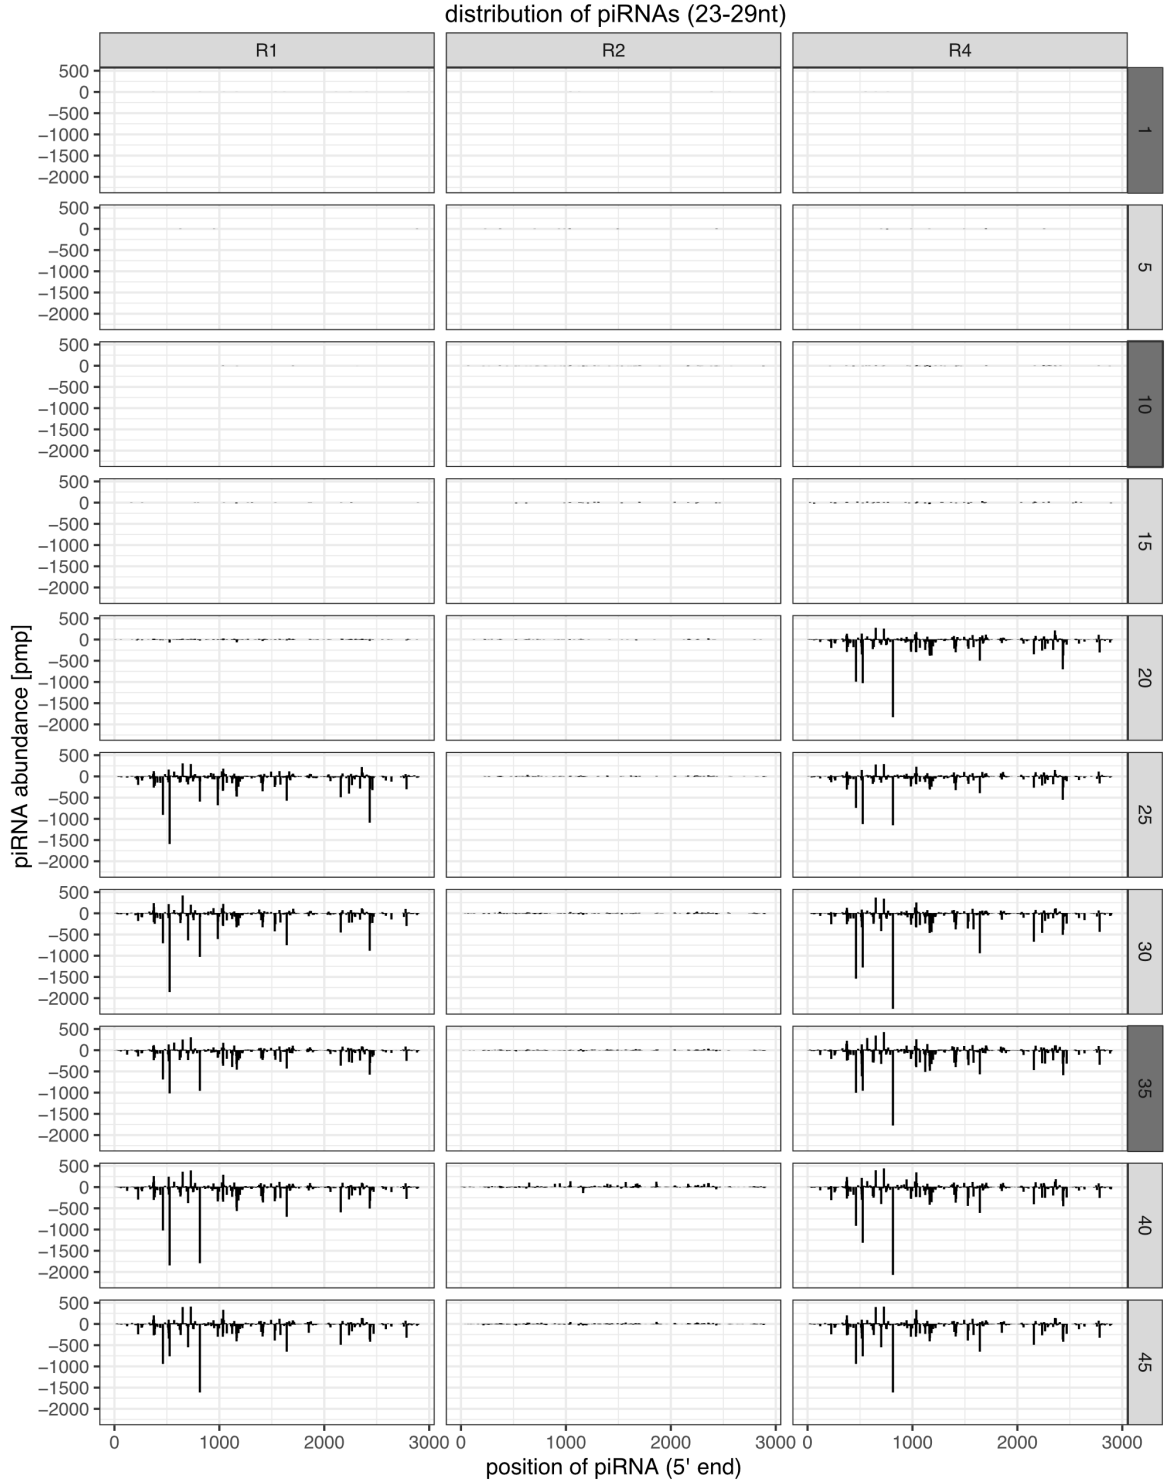

Figure 12: Distribution of piRNAs (23-29nt) along the *P-element*. Only the 5' positions of piRNAs are shown and the piRNA abundance is normalized to one million piRNAs. Replicates are at the top panel and the generations at the right panel. Sense piRNAs are shown on the positive y-axis and antisense piRNAs on the negative y-axis. small RNA data were either generated for whole bodies of female flies (light grey panels) or ovaries (dark grey panels).
