# Supplementary material for: Experimentally evolvingDrosophila erectapopulations may fail to establish an effective piRNA-based host defense against invadingP-elements
Source: HighWire-hosted journal article supplement (doi:10.1101/gr.278706.123), 2024-03-15
Supplement: Supplemental_Fig_S16.pdf [file Supplemental_Fig_S16.pdf]

# Intrapopulation hybrid dysgenesis at 29°C

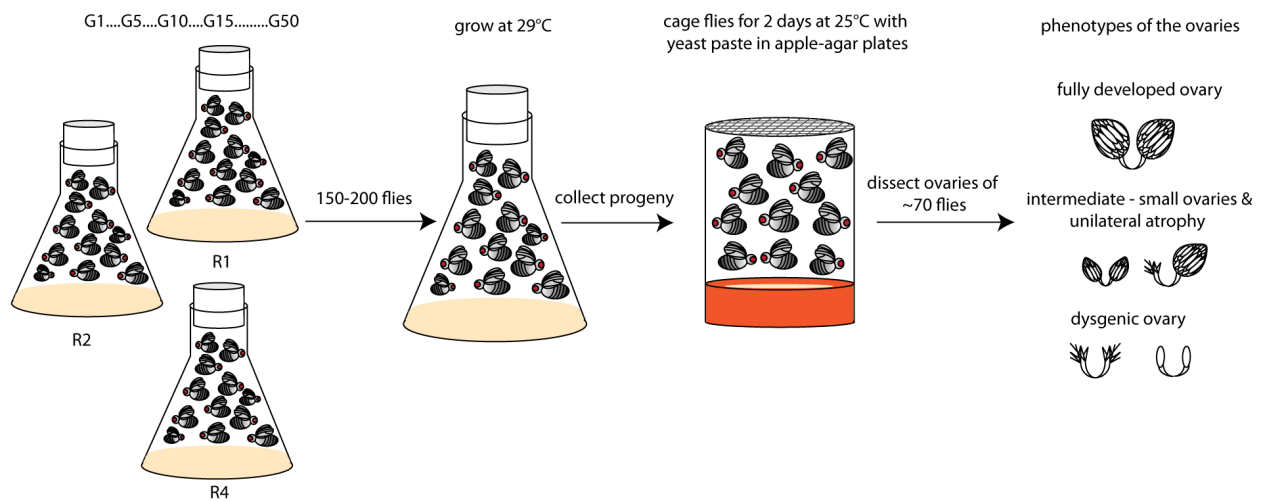

Figure 16: Overview of the gonadal dysgenesis assays performed for the three replicate populations (R1, R2, R4).
