# Supplementary material for: Experimentally evolvingDrosophila erectapopulations may fail to establish an effective piRNA-based host defense against invadingP-elements
Source: HighWire-hosted journal article supplement (doi:10.1101/gr.278706.123), 2024-03-15
Supplement: Supplemental_Fig_S17.pdf [file Supplemental_Fig_S17.pdf]

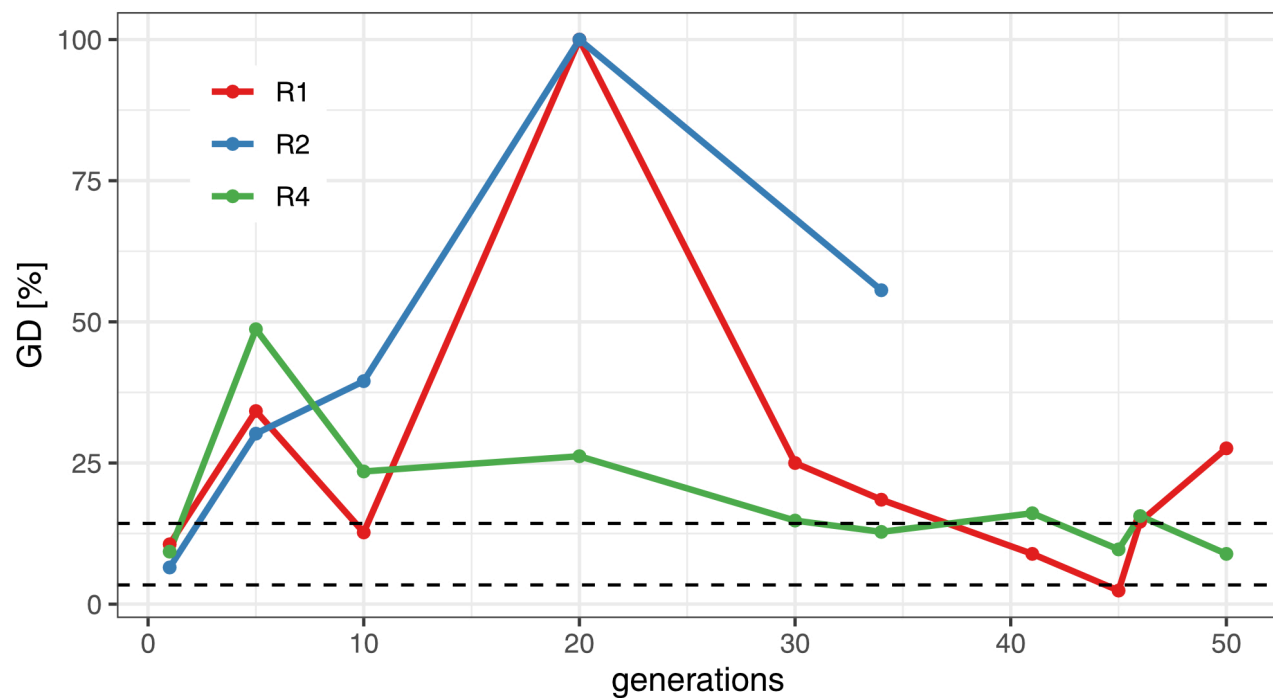

Figure 17: Extend of gonadal dysgenesis (GD) during the experiment. We allowed the experimental populations to lay eggs for 2-3 days, the eggs were reared at 29°C and the percentage of atrophied ovaries was estimated for all three replicates (R1-R4). Dashed lines indicate the range of GD observed for naive flies not having the *P-element*. Note that insufficient numbers of flies eclosed for replicate 2 after generation 34.
