# Supplementary material for: Experimentally evolvingDrosophila erectapopulations may fail to establish an effective piRNA-based host defense against invadingP-elements
Source: HighWire-hosted journal article supplement (doi:10.1101/gr.278706.123), 2024-03-15
Supplement: Supplemental_Fig_S19.pdf [file Supplemental_Fig_S19.pdf]

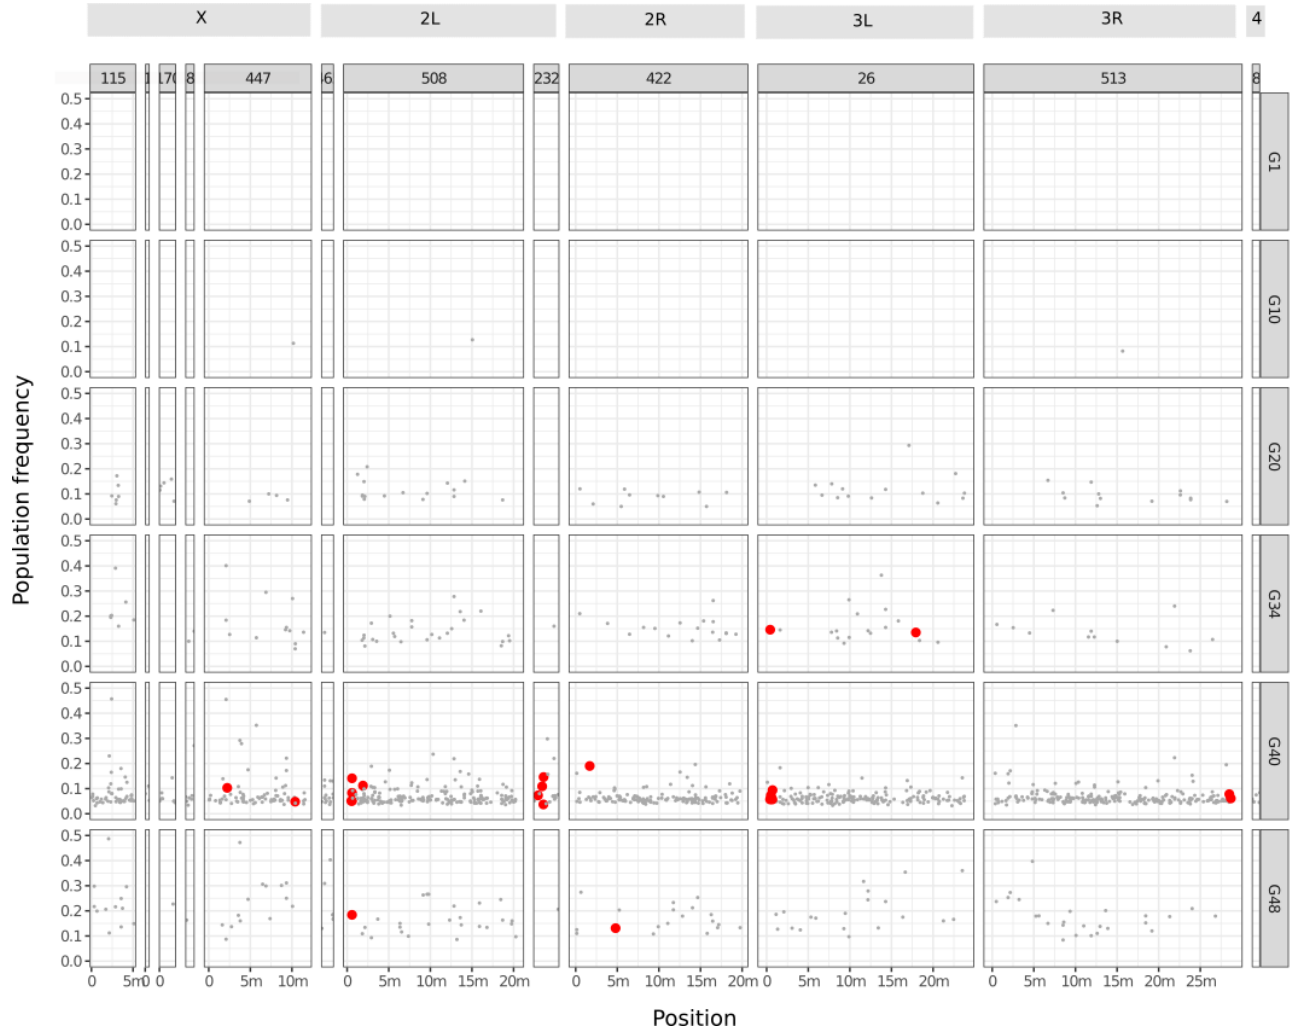

Figure 19: Position and population frequency of *P-element* insertions in replicate 1 based on short-read data. The contigs are in the top panel and the generations in the right panels. *P-element* insertions in piRNA clusters are shown in red. The likely order of *D. erecta* contigs was inferred by aligning the contigs to the *D. melanogaster* genome using Mauve [Darling et al., 2004]. m million base pairs
