# Supplementary material for: Experimentally evolvingDrosophila erectapopulations may fail to establish an effective piRNA-based host defense against invadingP-elements
Source: HighWire-hosted journal article supplement (doi:10.1101/gr.278706.123), 2024-03-15
Supplement: Supplemental_Fig_S20.pdf [file Supplemental_Fig_S20.pdf]

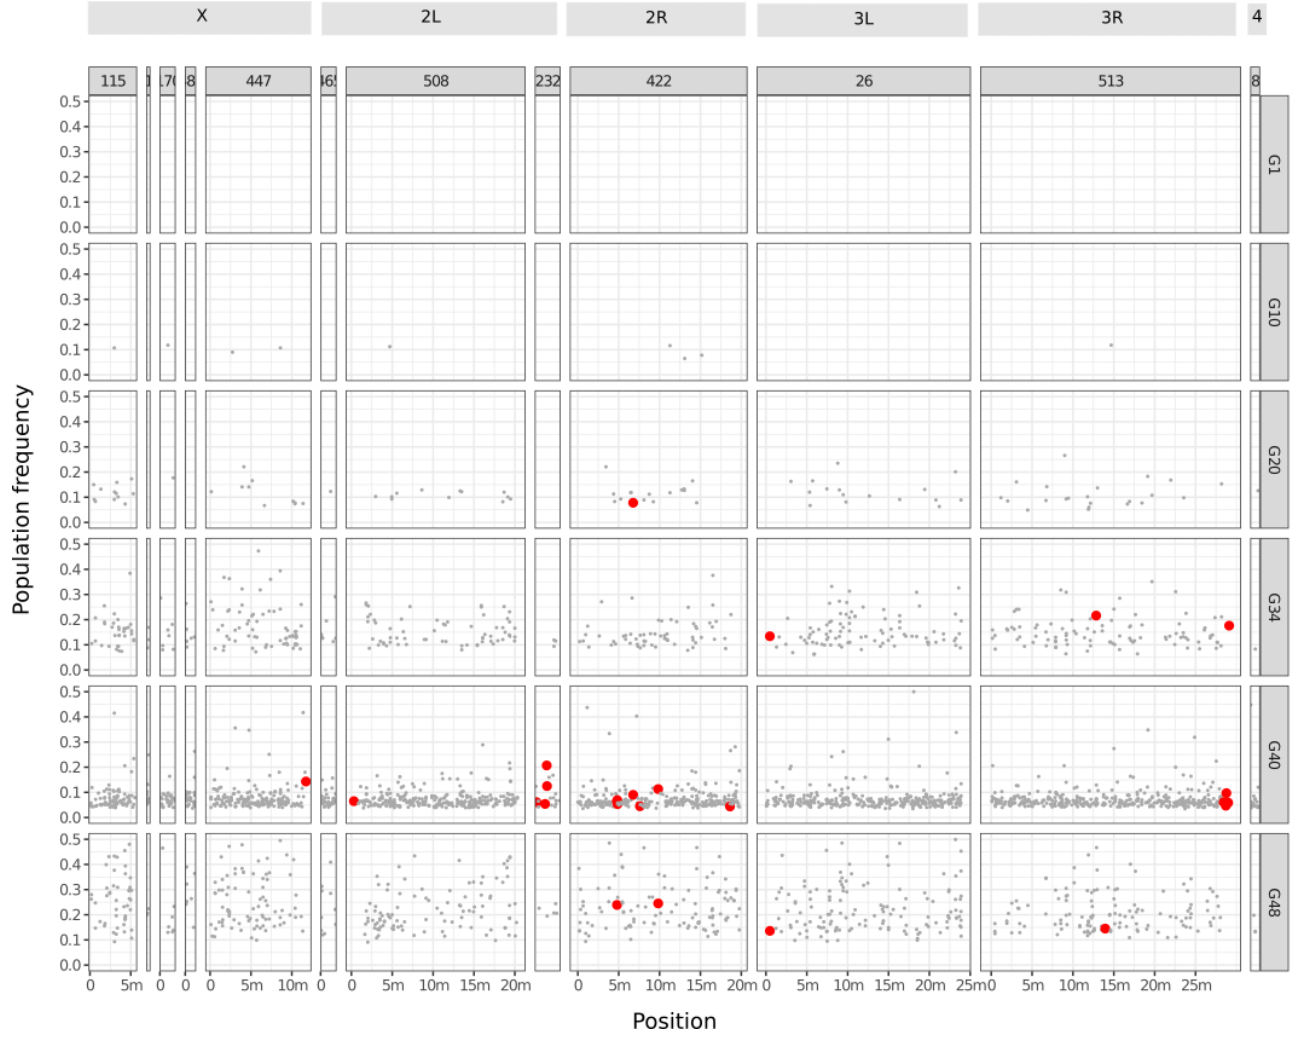

Figure 20: Position and population frequency of *P-element* insertions in replicate 2.
