# Supplementary material for: Experimentally evolvingDrosophila erectapopulations may fail to establish an effective piRNA-based host defense against invadingP-elements
Source: HighWire-hosted journal article supplement (doi:10.1101/gr.278706.123), 2024-03-15
Supplement: Supplemental_Fig_S22.pdf [file Supplemental_Fig_S22.pdf]

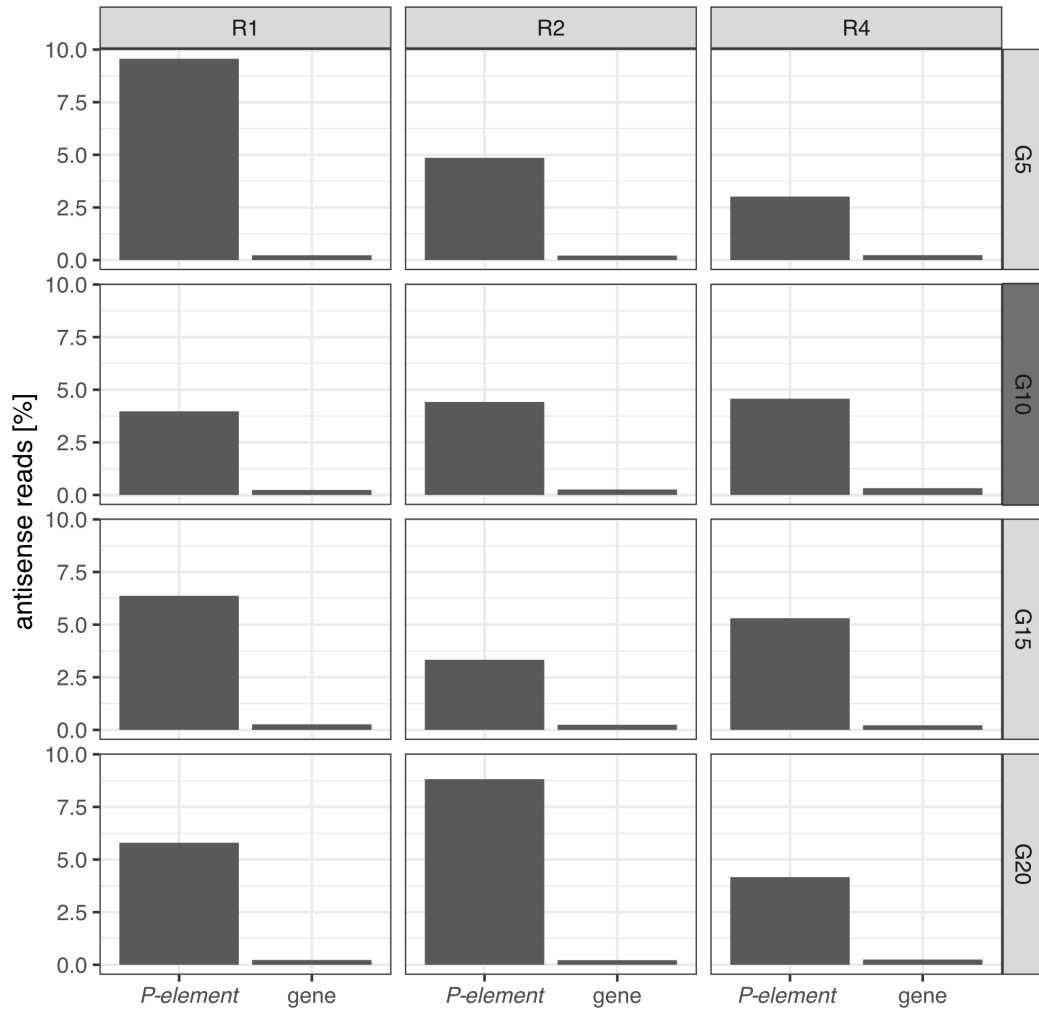

Figure 22: Percentage of antisense reads for the *P-element* and *D. erecta* transcripts at early generations of the invasion ( $\leq 20$  generations). Stranded RNA-seq data were generated for female flies (light grey panels) and ovaries (dark grey panel).
