# Supplementary material for: Experimentally evolvingDrosophila erectapopulations may fail to establish an effective piRNA-based host defense against invadingP-elements
Source: HighWire-hosted journal article supplement (doi:10.1101/gr.278706.123), 2024-03-15
Supplement: Supplemental_Fig_S25.pdf [file Supplemental_Fig_S25.pdf]

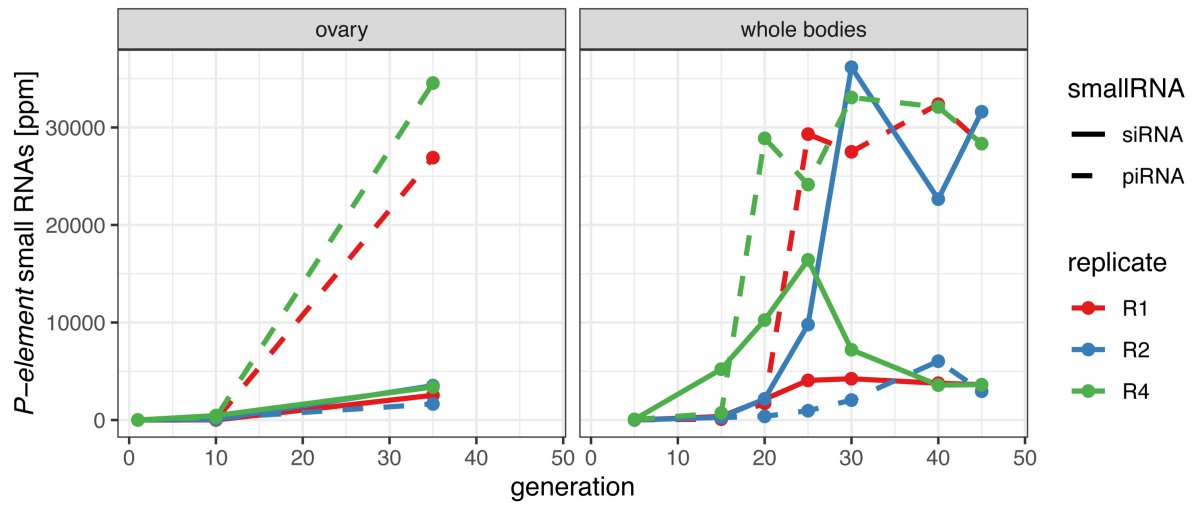

Figure 25: Abundance of siRNAs (20-22nt) during the *P-element* invasion in the three replicates (solid line). The abundance of piRNAs (23-29nt) is shown as reference (dashed lines). RNA was either extracted from whole bodies of female flies or from ovaries.
