# Supplementary material for: Experimentally evolvingDrosophila erectapopulations may fail to establish an effective piRNA-based host defense against invadingP-elements
Source: HighWire-hosted journal article supplement (doi:10.1101/gr.278706.123), 2024-03-15
Supplement: Supplemental_Fig_S29.pdf [file Supplemental_Fig_S29.pdf]

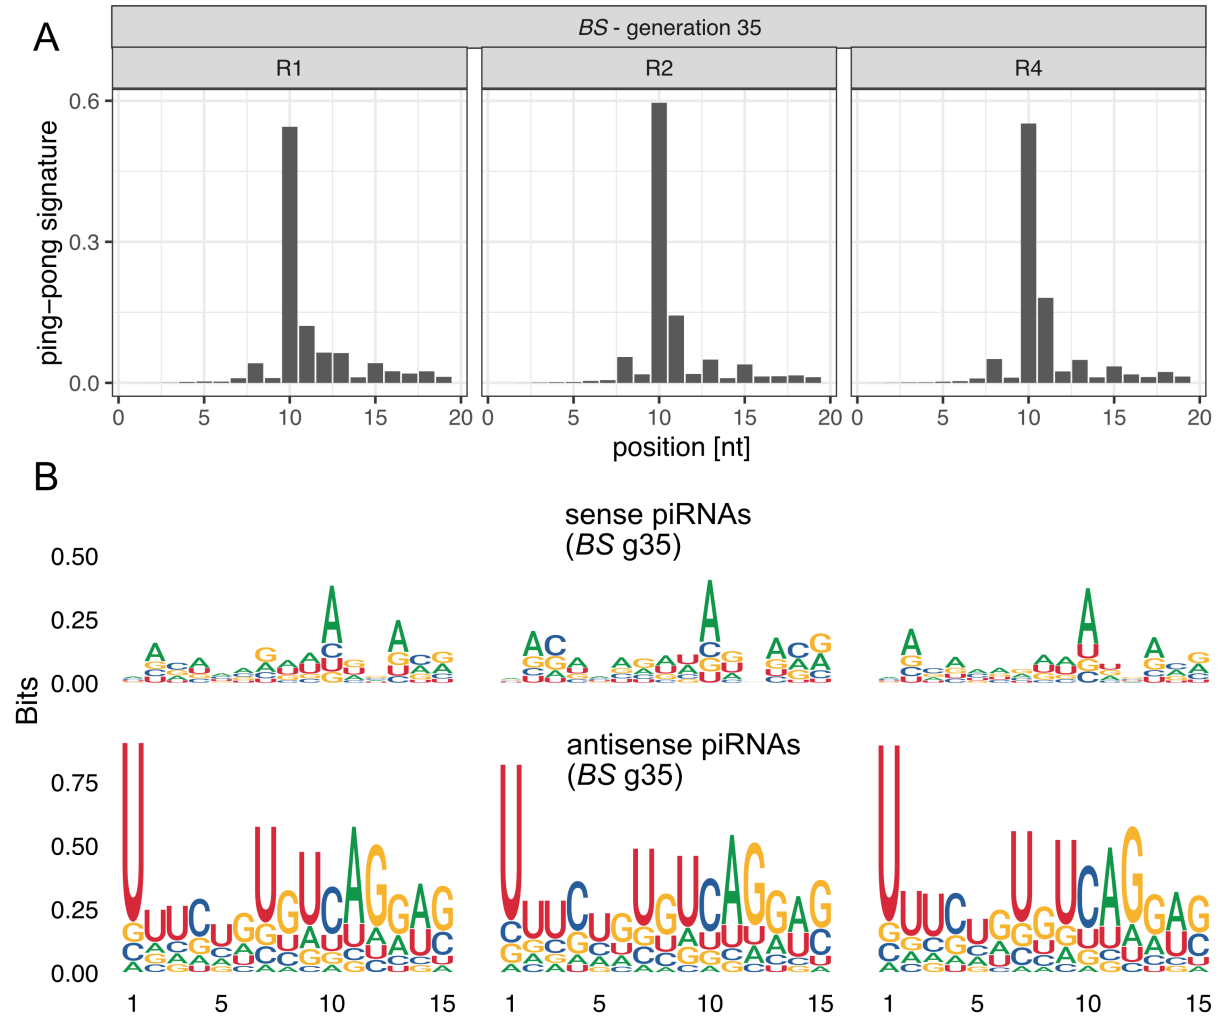

Figure 29: A) The ping-pong signature of *BS* in ovaries at generation 35. B) Motifs of sense and antisense piRNAs (23-29nt) complementary to *BS* in ovaries at generation 35.
