# Supplementary material for: Experimentally evolvingDrosophila erectapopulations may fail to establish an effective piRNA-based host defense against invadingP-elements
Source: HighWire-hosted journal article supplement (doi:10.1101/gr.278706.123), 2024-03-15
Supplement: Supplemental_Fig_S31.pdf [file Supplemental_Fig_S31.pdf]

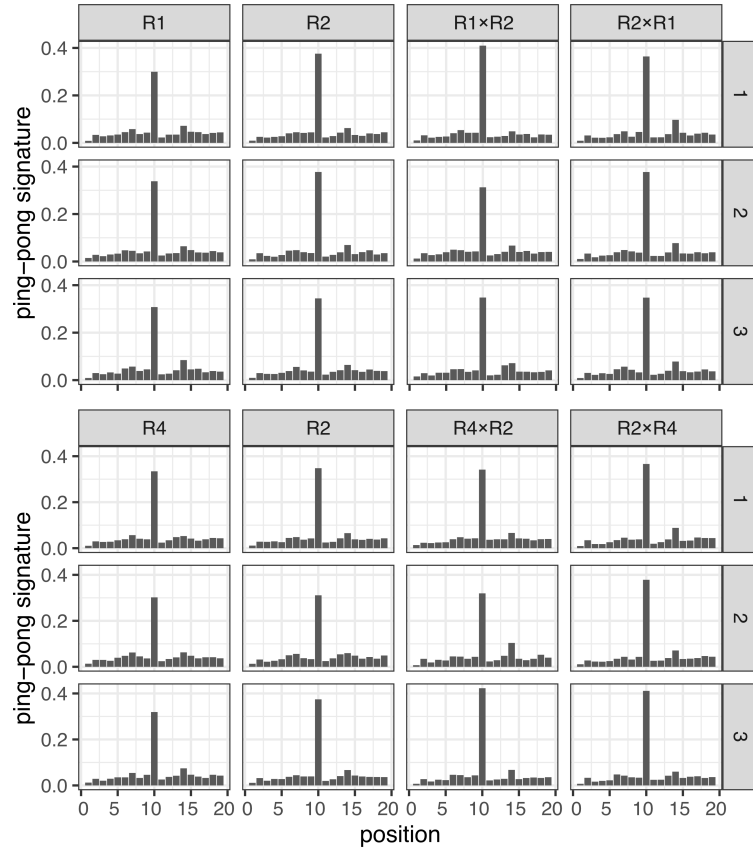

Figure 31: Ping-pong signatures of *Quasimodo* in the parents (R1, R2, R4) and the offspring (R1×R2, R2×R1, R4×R2, R2×R4) of reciprocal crosses among replicates.
