# Supplementary material for: Experimentally evolvingDrosophila erectapopulations may fail to establish an effective piRNA-based host defense against invadingP-elements
Source: HighWire-hosted journal article supplement (doi:10.1101/gr.278706.123), 2024-03-15
Supplement: Supplemental_Table_S6.pdf [file Supplemental_Table_S6.pdf]

Table 6: Extent of gonadal dysgenesis during the *P-element* invasion. Results are shown for all three replicates (rep) at different generations (gen). Naive flies not having the *P-element* (marked with '-' in rep and gen) were also analyzed. We estimated the number of flies having clearly visible ovarioles (normal), weakly visible ovarioles (weak), and no discernible ovarioles (dysgenic) at 29°C. Note that we did not obtain any viable females for some generations of R2. )

| rep | gen | normal | weak | dysgenic | dysgenic [%] |
|-----|-----|--------|------|----------|--------------|
| R1  | 1   | 28     | 3    | 2        | 10.6         |
| R2  | 1   | 28     | 2    | 1        | 6.5          |
| R4  | 1   | 65     | 6    | 4        | 9.3          |
| R1  | 5   | 73     | 0    | 38       | 34.2         |
| R2  | 5   | 30     | 0    | 13       | 30.2         |
| R4  | 5   | 37     | 5    | 35       | 48.7         |
| R1  | 10  | 61     | 2    | 8        | 12.7         |
| R2  | 10  | 35     | 5    | 22       | 39.5         |
| R4  | 10  | 26     | 0    | 8        | 23.5         |
| R1  | 20  | 0      | 0    | 23       | 100.0        |
| R2  | 20  | 0      | 0    | 27       | 100.0        |
| R4  | 20  | 15     | 1    | 5        | 26.2         |
| R1  | 30  | 24     | 0    | 8        | 25.0         |
| R2  | 30  | -      | -    | -        | -            |
| R4  | 30  | 76     | 3    | 12       | 14.8         |
| R1  | 34  | 42     | 4    | 8        | 18.5         |
| R2  | 34  | 7      | 2    | 9        | 55.6         |
| R4  | 34  | 34     | 0    | 5        | 12.8         |
| R1  | 41  | 25     | 1    | 2        | 8.9          |
| R2  | 41  | -      | -    | -        | -            |
| R4  | 41  | 94     | 5    | 16       | 16.1         |
| R1  | 45  | 83     | 0    | 2        | 2.4          |
| R2  | 45  | -      | -    | -        | -            |
| R4  | 45  | 60     | 1    | 6        | 9.7          |
| R1  | 46  | 67     | 1    | 11       | 14.6         |
| R2  | 46  | -      | -    | -        | -            |
| R4  | 46  | 92     | 0    | 17       | 15.6         |
| R1  | 50  | 41     | 2    | 15       | 27.6         |
| R2  | 50  | -      | -    | -        | -            |
| R4  | 50  | 25     | 1    | 2        | 8.9          |
| -   | -   | 23     | 0    | 1        | 4.2          |
| -   | -   | 18     | 0    | 3        | 14.3         |
| -   | -   | 28     | 0    | 1        | 3.4          |
