# Supplementary material for: Experimentally evolvingDrosophila erectapopulations may fail to establish an effective piRNA-based host defense against invadingP-elements
Source: HighWire-hosted journal article supplement (doi:10.1101/gr.278706.123), 2024-03-15
Supplement: Supplemental_Table_S8.pdf [file Supplemental_Table_S8.pdf]

Table 8: Overview of *P-element* insertions in piRNA clusters that are supported by at least two long-reads at early generations of the experimental populations ( $g. \leq 26$ ). Reads from different Oxford Nanopore libraries (runs) of the same sample were merged. For each insertion we show the contig, the position (*pos*), the maximum number of bases aligning to the *P-element* (*sup*; the length of the *P-element* is 2,907bp) and the orientation of the *P-element* insertion (*ori*). Given the coverage (*cov*) and the number of reads (*r*) supporting a *P-element* insertion the population frequency of the insertion ( $f = r/cov$ ) can be computed. The coverage was inferred from IGV and the number of reads supporting an insertion was corrected ( $+x$  in column *r*) if a read was missed by our automated approach (for very long reads with central *P-element* insertions, minimap2 may miss supplementary alignments to the *P-element*; these *P-element* insertions are instead reported as long insertions). For 5kb windows around each insertion we also show the expression level of piRNAs (*expr* uniquely mapping piRNAs per million piRNAs), the strand bias (*s.b*: -1 all piRNAs are antisense, 1 all piRNAs are sense, 0 equal amounts of piRNAs are sense and antisense) and the degree of maternal transmission (*m.t*: 0 no piRNAs are found in the embryo, 1 equal amounts of piRNA in ovaries and embryo). Note that the low population frequency (*f*) of the insertions is not compatible with a model assuming that a fixed cluster insertions is responsible for silencing the *P-element* around generation 20 in replicates 1 and 4 (R1, R4). rep. replicate

| rep. | g. | contig     | pos        | cov | r   | f    | sup   | ori | expr    | s.b   | m.t  |
|------|----|------------|------------|-----|-----|------|-------|-----|---------|-------|------|
| R1   | 20 | contig_232 | 1,319,408  | 73  | 6+2 | 0.11 | 2,021 | fwd | 39.40   | 0.62  | 0.51 |
| R1   | 20 | contig_26  | 428,194    | 92  | 2   | 0.02 | 2,437 | rev | 809.94  | -0.88 | 0.06 |
| R1   | 20 | contig_422 | 1,690,050  | 203 | 3   | 0.01 | 2,907 | fwd | 1049.45 | 0.82  | 0.61 |
| R1   | 20 | contig_422 | 9,830,474  | 95  | 3   | 0.03 | 2,907 | fwd | 2291.91 | -0.21 | 0.06 |
| R2   | 18 | contig_508 | 579,832    | 62  | 7+2 | 0.14 | 2,389 | rev | 9.11    | -0.47 | 0.84 |
| R2   | 21 | contig_232 | 3,074,029  | 180 | 2   | 0.01 | 2,825 | fwd | 225.86  | -0.96 | 0.02 |
| R2   | 21 | contig_508 | 579,833    | 134 | 5+2 | 0.05 | 1,559 | rev | 9.11    | -0.47 | 0.84 |
| R4   | 25 | contig_513 | 12,838,058 | 91  | 3+1 | 0.04 | 1,434 | fwd | 1128.25 | 1.00  | 0.37 |
| R4   | 25 | contig_513 | 28,883,839 | 64  | 3   | 0.05 | 2,613 | rev | 24.30   | -0.47 | 0.24 |
