# Supplementary material for: Experimentally evolvingDrosophila erectapopulations may fail to establish an effective piRNA-based host defense against invadingP-elements
Source: HighWire-hosted journal article supplement (doi:10.1101/gr.278706.123), 2024-03-15
Supplement: Supplemental_Table_S9.pdf [file Supplemental_Table_S9.pdf]

Table 9: Overview of reads supporting *P-element* insertions inside (*obs.ci*) and outside of piRNA clusters (*non.ci*) in our long-read libraries. Based on the shotgun model each diploid individual should carry about four *P-element* insertions in a piRNA cluster, i.e. two insertions per haploid genome [Kofler et al., 2018, Kofler, 2019]. Given that the average coverage (*cov*) approximates the number of haploid genomes present in a sample, the number of cluster insertions expected under the shotgun model can be computed ( $exp.ci = 2 \times cov$ ). Note that, in all samples, the number of *P-element* insertions in piRNA clusters is lower than expected under the shotgun model ( $obs.ci/exp.ci < 1$ ).

| rep | gen | run | cov   | non.ci | obs.ci | exp.ci | obs./exp |
|-----|-----|-----|-------|--------|--------|--------|----------|
| R1  | G20 | 1   | 90.5  | 1043   | 18     | 181.0  | 0.10     |
| R2  | G18 | 1   | 53.2  | 685    | 12     | 106.5  | 0.11     |
| R2  | G21 | 1   | 58.5  | 1394   | 4      | 116.9  | 0.03     |
| R2  | G21 | 2   | 31.8  | 854    | 3      | 63.6   | 0.05     |
| R2  | G21 | 3   | 12.1  | 450    | 7      | 24.2   | 0.29     |
| R2  | G26 | 1   | 28.8  | 1267   | 6      | 57.7   | 0.10     |
| R2  | G51 | 1   | 12.4  | 1239   | 17     | 24.8   | 0.69     |
| R2  | G51 | 2   | 127.2 | 14758  | 170    | 254.4  | 0.67     |
| R4  | G25 | 1   | 63.7  | 1619   | 8      | 127.5  | 0.06     |
| R4  | G51 | 1   | 70.9  | 2521   | 26     | 141.8  | 0.18     |
